# Supplementary material for: Long-term Follow-up After Transcatheter Aortic Valve Replacement
Source: PubMed Central journal article supplement — CJC Open. 2021 Feb 1;3(7):845–53. doi: 10.1016/j.cjco.2021.01.012 (PMC8347830; doi:10.1016/j.cjco.2021.01.012), 2021-02-01
Supplement: mmc1.pdf [file mmc1.pdf]

## SUPPLEMENTARY MATERIAL

Supplemental Table S1 – Valve sizing and annulus sizes for balloon-expandable and self-expandable valves

| Valve sizes        | Self-expandable<br>n=625 | Mean (95% CI)<br>Annulus size in mm,<br>TOE derived | Balloon-Expandable<br>n=170 | Mean (95% CI)<br>Annulus size in mm,<br>TOE derived |
|--------------------|--------------------------|-----------------------------------------------------|-----------------------------|-----------------------------------------------------|
| 23 – % of patients | 0%                       | n.a.                                                | 33.1%                       | 21.14 (20.79 - 21.49)                               |
| 26 – % of patients | 29.6%                    | 20.59 (20.05 - 21.13)                               | 66.9%                       | 23.03 (22.77 - 23.29)                               |
| 29 – % of patients | 57.1%                    | 24.09 (23.66 - 24.52)                               | 0%                          | n.a.                                                |
| 31 – % of patients | 13.2%                    | 26.00 (24.97 - 27.03)                               | n.a.                        | n.a.                                                |

Supplemental Table S2 – Baseline Characteristics of the Study Population, Self-expandable and Balloon-expandable valves

| CHARACTERISTICS                       | All patients<br>n=795 | Self-expandable<br>n=625 | Balloon-Expandable<br>n=170 | p                |
|---------------------------------------|-----------------------|--------------------------|-----------------------------|------------------|
| Age (years)                           | 81.0 (77.0;85.0)      | 81.0 (77.0;85.0)         | 82.0 (78.0;85.0)            | <b>0.041</b>     |
| Male sex (%)                          | 330 (41.5%)           | 300 (48.0%)              | 30 (17.6%)                  | <b>&lt;0.001</b> |
| Body mass index (kg/m <sup>2</sup> )  | 27.3 (24.1;30.9)      | 27.2 (24.2;30.8)         | 27.4 (23.6;31.2)            | 0.894            |
| Logistic EuroSCORE                    | 18.5 (12.8;29.0)      | 18.3 (12.7;29.1)         | 19.8 (13.1;28.5)            | 0.602            |
| STS-Score Risk of mortality           | 8.1 (5.4;12.3)        | 7.9 (5.3;12.4)           | 9.3 (5.8;12.2)              | 0.168            |
| eGFR (ml/min/1.73m <sup>2</sup> )     | 53 (39;69)            | 54 (40;70)               | 53 (38;68)                  | 0.484            |
| NYHA class - no. (%)                  |                       |                          |                             |                  |
| II                                    | 124 (15.6%)           | 93 (14.9%)               | 31 (18.2%)                  | 0.285            |
| III                                   | 494 (62.1%)           | 389 (62.2%)              | 105 (61.8%)                 | 0.910            |
| IV                                    | 132 (16.6%)           | 105 (16.8%)              | 27 (15.8%)                  | 0.776            |
| Diabetes mellitus - no. (%)           | 345 (43.4%)           | 267 (42.7%)              | 78 (45.9%)                  | 0.191            |
| Hypertension - no. (%)                | 717 (90.2%)           | 569 (91.0%)              | 148 (87.0%)                 | 0.677            |
| Coronary artery disease - no. (%)     | 368 (46.3%)           | 312 (49.9%)              | 56 (32.9%)                  | 0.601            |
| Prior myocardial infarction - no. (%) | 98 (12.3%)            | 86 (13.8%)               | 12 (7.1%)                   | <b>0.030</b>     |
| Prior stroke - no. (%)                | 63 (7.9%)             | 47 (7.5%)                | 16 (9.4%)                   | 0.311            |
| Peripheral artery disease - no. (%)   | 90 (11.3%)            | 79 (12.6%)               | 11 (6.5%)                   | <b>0.039</b>     |
| COPD - no. (%)                        | 289 (36.4%)           | 222 (35.5%)              | 67 (39.4%)                  | 0.597            |
| Atrial fibrillation - no. (%)         | 274 (34.5%)           | 207 (33.1%)              | 67 (39.4%)                  | 0.199            |
| Prior CABG - no. (%)                  | 117 (14.7%)           | 103 (16.5%)              | 14 (8.2%)                   | <b>0.014</b>     |
| Prior PCI - no. (%)                   | 182 (22.9%)           | 145 (23.2%)              | 37 (21.8%)                  | 0.952            |
| Grip strength                         | 18.0 (13.0;24.5)      | 19.0 (13.0;27.5)         | 16.3 (11.2;18.8)            | 0.056            |
| Gait speed                            | 7.0 (6.0;9.0)         | 6.0 (5.0;9.0)            | 7.5 (6.0;13.0)              | 0.063            |
| Echocardiographic findings            |                       |                          |                             |                  |
| LV Ejection fraction < 55% - no. (%)  | 314 (39.5%)           | 261 (41.8%)              | 53 (31.2%)                  | <b>0.048</b>     |
| Peak velocity baseline - m/s          | 4.2 (3.7;4.7)         | 4.2 (3.7;4.7)            | 4.3 (3.9;4.8)               | <b>0.009</b>     |
| Maximum gradient - mmHg               | 71 (56;88)            | 69 (55;87)               | 75 (60;93)                  | <b>0.009</b>     |
| Mean gradient - mmHg                  | 44 (35;56)            | 44 (34;54)               | 46 (35;60)                  | <b>0.025</b>     |
| AVA - cm <sup>2</sup>                 | 0.6 (0.5;0.8)         | 0.6 (0.5;0.8)            | 0.6 (0.5;0.8)               | <b>0.086</b>     |
| Systolic PAP > 60 mmHg – no. (%)      | 291 (36.6%)           | 201 (32.2%)              | 90 (52.9%)                  | <b>&lt;0.001</b> |
| MR ≥ 2 - no. (%)                      | 89 (11.2%)            | 67 (10.7%)               | 22 (12.9%)                  | 0.257            |

STS – Society of Thoracic Surgeons, eGFR – estimated Glomerular Filtration Rate, NYHA – New York Heart Association, COPD – Chronic Obstructive Pulmonary Disease, CABG – Coronary Artery Bypass Graft, PCI – Percutaneous Coronary Intervention, AVA – Aortic Valve Area, PAP – Pulmonary Artery Pressure, MR – Mitral Regurgitation. All values are given in median (Interquartile range) or number (%) unless otherwise stated.

Supplemental Table S3 – Baseline Characteristics of the Study Population, Postdilatation and No Postdilatation groups

| CHARACTERISTICS                       | All patients<br>n=795 | Postdilatation<br>n=98 | No Postdilatation<br>n=697 | p            |
|---------------------------------------|-----------------------|------------------------|----------------------------|--------------|
| Age (years)                           | 81.0 (77.0;85.0)      | 80.0 (77.0;84.0)       | 81.0 (77.0;85.0)           | 0.205        |
| Male sex (%)                          | 330 (41.5%)           | 54 (55.1%)             | 276 (39.6%)                | <b>0.004</b> |
| Body mass index (kg/m <sup>2</sup> )  | 27.3 (24.1;30.9)      | 26.7 (23.3;29.5)       | 27.3 (24.2;31.1)           | 0.099        |
| Logistic EuroSCORE                    | 18.5 (12.8;29.0)      | 20.0 (14.0;33.2)       | 18.4 (12.6;28.5)           | <b>0.034</b> |
| STS-Score Risk of mortality           | 8.1 (5.4;12.3)        | 9.4 (5.4;14.8)         | 7.9 (5.4;12.2)             | 0.102        |
| eGFR (ml/min/1.73m <sup>2</sup> )     | 53 (39;69)            | 55 (40;71.0)           | 53 (39;69)                 | 0.616        |
| NYHA class - no. (%)                  |                       |                        |                            |              |
| II                                    | 124 (15.6%)           | 14 (14.3%)             | 110 (15.7%)                | 0.702        |
| III                                   | 494 (62.1%)           | 59 (60.2%)             | 435 (62.4%)                | 0.673        |
| IV                                    | 132 (16.6%)           | 17 (17.3%)             | 115 (16.5%)                | 0.833        |
| Diabetes mellitus - no. (%)           | 345 (43.4%)           | 38 (38.8%)             | 307 (44.0%)                | 0.250        |
| Hypertension - no. (%)                | 717 (90.2%)           | 88 (89.8%)             | 629 (90.2%)                | 0.468        |
| Coronary artery disease - no. (%)     | 368 (46.3%)           | 50 (51.0%)             | 318 (45.6%)                | 0.282        |
| Prior myocardial infarction - no. (%) | 98 (12.3%)            | 17 (17.3%)             | 81 (11.6%)                 | 0.127        |
| Prior stroke - no. (%)                | 63 (7.9%)             | 10 (10.2%)             | 53 (7.6%)                  | 0.404        |
| Peripheral artery disease - no. (%)   | 90 (11.3%)            | 11 (11.2%)             | 79 (11.3%)                 | 0.925        |
| COPD - no. (%)                        | 289 (36.4%)           | 43 (43.9%)             | 246 (35.3%)                | 0.058        |
| Atrial fibrillation - no. (%)         | 274 (34.5%)           | 35 (35.7%)             | 239 (34.3%)                | 0.845        |
| Prior CABG - no. (%)                  | 117 (14.7%)           | 22 (22.4%)             | 95 (13.6%)                 | <b>0.026</b> |
| Prior PCI - no. (%)                   | 182 (22.9%)           | 25 (25.5%)             | 157 (22.5%)                | 0.581        |
| Grip strength                         | 18.0 (13.0;24.5)      | 13.0 (10.0;23.0)       | 18.3 (13.5;25.0)           | 0.061        |
| Gait speed                            | 7.0 (6.0;9.0)         | 7.0 (5.0;9.0)          | 7.0 (6.0;9.3)              | 0.667        |
| Echocardiographic findings            |                       |                        |                            |              |
| LV Ejection fraction < 55% - no. (%)  | 314 (39.5%)           | 47 (48.0%)             | 267 (38.3%)                | 0.072        |
| Peak velocity baseline - m/s          | 4.2 (3.7;4.7)         | 4.2 (3.6;4.8)          | 4.2 (3.7;4.7)              | 0.617        |
| Maximum gradient - mmHg               | 71 (56;88)            | 69 (53;93)             | 71 (56;87)                 | 0.617        |
| Mean gradient - mmHg                  | 44 (35;56)            | 42 (32;61)             | 44 (35;55)                 | 0.351        |
| AVA - cm <sup>2</sup>                 | 0.6 (0.5;0.8)         | 0.6 (0.5;0.8)          | 0.6 (0.5;0.8)              | 0.234        |
| Systolic PAP > 60 mmHg – no. (%)      | 291 (36.6%)           | 39 (39.8%)             | 252 (36.2%)                | 0.549        |
| MR ≥ 2 - no. (%)                      | 89 (11.2%)            | 11 (11.2%)             | 78 (11.2%)                 | 0.938        |

STS – Society of Thoracic Surgeons, eGFR – estimated Glomerular Filtration Rate, NYHA – New York Heart Association, COPD – Chronic Obstructive Pulmonary Disease, CABG – Coronary Artery Bypass Graft, PCI – Percutaneous Coronary Intervention, AVA – Aortic Valve Area, PAP – Pulmonary Artery Pressure, MR – Mitral Regurgitation. All values are given in median (Interquartile range) or number (%) unless otherwise stated.

Supplemental Table S4 – Procedural Characteristics of the Study Population, Self-expandable and Balloon- expandable valves

| CHARACTERISTICS                    | All patients<br>n=795 | Self-expandable<br>n=625 | Balloon-Expandable<br>n=170 | p                |
|------------------------------------|-----------------------|--------------------------|-----------------------------|------------------|
| Time of procedure - min            | 44.0 (35.0;60.0)      | 44.0 (35.0;60.0)         | 43.0 (36.5;51.0)            | 0.337            |
| Amount of CM for procedure - ml    | 125 (105;150)         | 125 (105;151)            | 125 (105;151)               | 0.457            |
| Postdilatation                     | 98 (12.3%)            | 88 (14.8%)               | 10 (5.9%)                   | <b>0.004</b>     |
| Device success                     | 732 (92.1%)           | 573 (91.7%)              | 159 (93.5%)                 | 0.429            |
| Concomitant PCI                    | 2 (0.3%)              | 2 (0.3%)                 | 0 (0%)                      | 0.538            |
| Post-procedural variables          |                       |                          |                             |                  |
| Myocardial infarction - no. (%)    | 7 (0.9%)              | 5 (0.8%)                 | 2 (1.2%)                    | 0.358            |
| Stroke - no. (%)                   | 42 (5.3%)             | 32 (5.1%)                | 10 (5.9%)                   | 0.150            |
| Death within 24 hours - no. (%)    | 11 (1.4%)             | 9 (1.4%)                 | 2 (1.2%)                    | 0.874            |
| New pacemaker implantation         | 165 (20.7%)           | 145 (23.2%)              | 20 (11.6%)                  | <b>0.003</b>     |
| Life Threatening or major bleeding | 255 (32.1%)           | 211 (33.8%)              | 44 (25.9%)                  | 0.473            |
| Cardiac tamponade                  | 31 (3.9%)             | 25 (4.0%)                | 6 (3.5%)                    | 0.862            |
| AKI (any stage)                    | 156 (19.6%)           | 112 (17.9%)              | 44 (25.9%)                  | <b>&lt;0.001</b> |
| AKI stage I - no. (%)              | 77 (9.7%)             | 58 (9.3%)                | 19 (11.2%)                  | 0.074            |
| AKI stage II - no. (%)             | 18 (2.3%)             | 16 (2.6%)                | 2 (1.2%)                    | 0.478            |
| AKI stage III - no. (%)            | 61 (7.7%)             | 41 (6.6%)                | 23 (13.5%)                  | <b>&lt;0.001</b> |
| Need for haemodialysis - no. (%)   | 63 (7.9%)             | 41 (6.6%)                | 22 (12.9%)                  | <b>0.006</b>     |
| Hospitalization length - days      | 20 (15;27)            | 20 (15;28)               | 21 (15;25)                  | 0.497            |

CM – Contrast Medium, PCI – Percutaneous Coronary Intervention,

Supplemental Table S5 – Procedural Characteristics of the Study Population, Postdilatation and No Postdilatation groups

| CHARACTERISTICS                              | All patients<br>n=795 | Postdilatation<br>n=98 | No Postdilatation<br>n=697 | p                |
|----------------------------------------------|-----------------------|------------------------|----------------------------|------------------|
| Time of procedure - min                      | 44.0 (35.0;60.0)      | 47.0 (38.5;66.0)       | 43.0 (35.0;60.0)           | <b>0.011</b>     |
| Amount of CM for procedure - ml              | 125 (105;150)         | 140 (115;190)          | 125 (105;150)              | <b>&lt;0.001</b> |
| Self-expandable valve no. (%)                | 625 (78.6%)           | 88 (89.8%)             | 537 (77.0%)                | <b>0.004</b>     |
| Balloon-expandable valve no. (%)             | 170 (21.4%)           | 10 (10.2%)             | 160 (23.0%)                | <b>0.004</b>     |
| Device success                               | 732 (92.1%)           | 77 (78.6%)             | 655 (94.0%)                | <b>&lt;0.001</b> |
| Concomitant PCI                              | 2 (0.3%)              | 0 (0.0%)               | 2 (0.3%)                   | 0.596            |
| Post-procedural variables                    |                       |                        |                            |                  |
| Myocardial infarction - no. (%)              | 7 (0.9%)              | 1 (1.0%)               | 6 (0.9%)                   | 0.871            |
| Stroke - no. (%)                             | 42 (5.3%)             | 10 (10.2%)             | 32 (4.6%)                  | <b>0.019</b>     |
| Death within 24 hours - no. (%)              | 11 (1.4%)             | 1 (1.0%)               | 10 (1.4%)                  | 0.875            |
| New pacemaker implantation - no. (%)         | 165 (20.7%)           | 21 (21.4%)             | 144 (20.7%)                | 0.932            |
| Life Threatening or major bleeding - no. (%) | 255 (32.1%)           | 32 (32.7%)             | 223 (32.0%)                | 0.872            |
| Cardiac tamponade - no. (%)                  | 31 (3.9%)             | 3 (3.1%)               | 28 (4.0%)                  | 0.615            |
| AKI (any stage)                              | 156 (19.6%)           | 25 (25.5%)             | 131 (18.8%)                | 0.115            |
| AKI stage I - no. (%)                        | 77 (9.7%)             | 10 (10.2%)             | 67 (9.6%)                  | 0.854            |
| AKI stage II - no. (%)                       | 18 (2.3%)             | 2 (2.0%)               | 16 (2.3%)                  | 0.873            |
| AKI stage III - no. (%)                      | 61 (7.7%)             | 15 (15.3%)             | 48 (6.9%)                  | <b>0.026</b>     |
| Need for haemodialysis - no. (%)             | 63 (7.9%)             | 15 (15.3%)             | 48 (6.9%)                  | <b>0.006</b>     |
| Hospitalization length - days                | 20 (15;27)            | 21 (15;26)             | 20 (15;27)                 | 0.614            |

CM – Contrast Medium, PCI – Percutaneous Coronary Intervention,



Supplemental Table S6 – Predictors of mortality at 8 years for subgroups adjusted for differences in baseline and procedural characteristic using Cox regression analysis

| Parameter                           | Self-expandable<br>n=625 | Balloon-Expandable<br>n=170 | Univariate<br>p  | Multivariate            |                  |
|-------------------------------------|--------------------------|-----------------------------|------------------|-------------------------|------------------|
|                                     |                          |                             |                  | HR (95%CI)              | p                |
| Age (years)                         | 81.0 (77.0;85.0)         | 82.0 (78.0;85.0)            | <b>0.041</b>     | 1.02 (1.00-1.03)        | 0.070            |
| Male sex (%)                        | 300 (48.0%)              | 30 (17.6%)                  | <b>&lt;0.001</b> | 1.00 (0.82-1.23)        | 0.980            |
| Prior MI - no. (%)                  | 86 (13.8%)               | 12 (7.1%)                   | <b>0.030</b>     | 1.13 (0.85-1.51)        | 0.389            |
| PAD - no. (%)                       | 79 (12.6%)               | 11 (6.5%)                   | <b>0.039</b>     | <b>1.95 (1.49-2.56)</b> | <b>&lt;0.001</b> |
| Prior CABG - no. (%)                | 103 (16.5%)              | 14 (8.2%)                   | <b>0.014</b>     | 1.33 (0.99-1.78)        | 0.055            |
| LVEF < 55 % - no. (%)               | 261 (41.8%)              | 53 (31.2%)                  | <b>0.048</b>     | <b>1.27 (1.05-1.53)</b> | <b>0.014</b>     |
| Vmax - m/s                          | 4.2 (3.7;4.7)            | 4.3 (3.9;4.8)               | <b>0.009</b>     | 0.82 (0.72-0.94)        | <b>0.004</b>     |
| Systolic PAP<br>> 60 mmHg - no. (%) | 201 (32.2%)              | 90 (52.9%)                  | <b>&lt;0.001</b> | 1.23 (1.02-1.49)        | <b>0.035</b>     |
| Postdilatation                      | 88 (14.8%)               | 10 (5.9%)                   | <b>0.004</b>     | 0.99 (0.75-1.31)        | 0.940            |
| AKI stage III - no. (%)             | 38 (6.1%)                | 23 (13.5%)                  | <b>&lt;0.001</b> | 4.12 (3.01-5.64)        | <b>&lt;0.001</b> |
| New PM                              | 145 (23.2%)              | 20 (11.6%)                  | <b>0.003</b>     | 1.04 (0.86-1.26)        | 0.705            |

| Parameter               | Postdilatation<br>n=98 | No Postdilatation<br>n=697 | Univariate<br>p  | Multivariate            |                  |
|-------------------------|------------------------|----------------------------|------------------|-------------------------|------------------|
|                         |                        |                            |                  | HR (95%CI)              | p                |
| Male sex (%)            | 54 (55.1%)             | 276 (39.6%)                | <b>0.004</b>     | 0.91 (0.73-1.14)        | 0.416            |
| Logistic EuroSCORE      | 20.0 (14.0;33.2)       | 18.4 (12.6;28.5)           | <b>0.034</b>     | <b>1.01 (1.00-1.02)</b> | <b>0.008</b>     |
| Prior CABG - no. (%)    | 22 (22.4%)             | 95 (13.6%)                 | <b>0.026</b>     | <b>1.43 (1.02-2.02)</b> | <b>0.040</b>     |
| LVEF < 55% - no. (%)    | 47 (48.0%)             | 267 (38.3%)                | <b>0.072</b>     | 0.84 (0.68-1.04)        | 0.116            |
| COPD - no. (%)          | 43 (43.9%)             | 246 (35.3%)                | 0.058            | 1.25 (1.02-1.54)        | 0.032            |
| Time of procedure - min | 47.0 (38.5;66.0)       | 43.0 (35.0;60.0)           | <b>0.011</b>     | 1.00 (1.00-1.00)        | 0.394            |
| CM for procedure - ml   | 140 (115;190)          | 125 (105;150)              | <b>&lt;0.001</b> | 1.00 (1.00-1.00)        | 0.159            |
| SE valve no. (%)        | 88 (89.8%)             | 537 (77.0%)                | <b>0.004</b>     | 1.06 (0.80-1.40)        | 0.689            |
| Device success          | 77 (78.6%)             | 655 (94.0%)                | <b>&lt;0.001</b> | 1.08 (0.70-1.68)        | 0.719            |
| Stroke - no. (%)        | 10 (10.2%)             | 32 (4.6%)                  | <b>0.019</b>     | <b>1.67 (1.13-2.46)</b> | <b>0.010</b>     |
| AKI stage III - no. (%) | 15 (15.3%)             | 48 (6.9%)                  | <b>0.006</b>     | <b>2.71 (1.88-3.91)</b> | <b>&lt;0.001</b> |

MI – Myocardial Infarction, CABG – Coronary Artery Bypass Graft, LVEF – Left Ventricular Ejection Fraction, PAD – Peripheral Artery Disease, PM – Pacemaker, CM – Contrast Medium, SE valve – Self-Expandable valve

Supplemental Table S7 - Echocardiographic data (Self-expandable vs. Balloon-expandable)

|                        | Self-expandable  | Balloon-Expandable | p                |
|------------------------|------------------|--------------------|------------------|
| Discharge              | n=579            | n=135              |                  |
| AVA (cm <sup>2</sup> ) | 1.8 (1.6;2.2)    | 1.9 (1.7;2.1)      | 0.760            |
| vmax (m/s)             | 2.0 (1.7;2.3)    | 2.1 (1.8;2.4)      | <b>0.008</b>     |
| pmax (mmHg)            | 16.0 (12.0;21.0) | 17.0 (13.0;23.0)   | <b>0.008</b>     |
| pmean (mmHg)           | 9.0 (6.0;11.2)   | 9.0 (7.0;13.0)     | 0.061            |
| EF (%)                 | 60 (51;66)       | 63 (56;68)         | <b>0.002</b>     |
| AR ≥ 2 - no. (%)       | 55 (9.5%)        | 6 (4.4%)           | 0.077            |
| 1 year                 | n=323            | n=79               |                  |
| AVA (cm <sup>2</sup> ) | 1.8 (1.6;2.2)    | 1.7 (1.5;2.0)      | <b>0.020</b>     |
| vmax (m/s)             | 1.9 (1.6;2.2)    | 2.1 (1.8;2.4)      | <b>0.039</b>     |
| pmax (mmHg)            | 15.0 (10.0;20.0) | 18.0 (13.0;24.8)   | <b>&lt;0.001</b> |
| pmean (mmHg)           | 8.0 (5.0;10.8)   | 9.0 (6.0;13.0)     | <b>0.006</b>     |
| EF (%)                 | 60 (53;65)       | 62 (56;67)         | <b>0.034</b>     |
| AR ≥ 2 - no. (%)       | 24 (7.4%)        | 1 (0.7%)           | <b>0.045</b>     |
| 3 years                | n=107            | n=16               |                  |
| AVA (cm <sup>2</sup> ) | 1.8 (1.5;2.2)    | 1.7 (1.1;2.0)      | 0.178            |
| vmax (m/s)             | 1.8 (1.5;2.3)    | 2.3 (1.9;2.5)      | <b>0.047</b>     |
| pmax (mmHg)            | 14.0 (9.5;21.0)  | 19.0 (13.5;22.8)   | <b>0.024</b>     |
| pmean (mmHg)           | 7.9 (5.4;12.0)   | 9.5 (8.0;12.0)     | 0.060            |
| EF (%)                 | 58 (50;65)       | 61 (57;66)         | 0.197            |
| AR ≥ 2 - no. (%)       | 7 (6.5%)         | 0 (0.0%)           | 0.319            |
| 5 years                | n=72             | n=14               |                  |
| AVA (cm <sup>2</sup> ) | 1.8 (1.5;2.1)    | 1.3 (1.2;1.6)      | <b>0.016</b>     |
| vmax (m/s)             | 1.7 (1.4;2.1)    | 2.2 (2.0;2.9)      | <b>0.003</b>     |
| pmax (mmHg)            | 14.0 (8.5;19.0)  | 19.0 (18.0;39.3)   | <b>0.001</b>     |
| pmean (mmHg)           | 7.0 (5.0;10.0)   | 11.0 (9.0;20.3)    | <b>0.001</b>     |
| EF (%)                 | 58 (50;62)       | 56 (50;64)         | 0.981            |
| AR ≥ 2 - no. (%)       | 4 (5.6%)         | 0 (0.0%)           | 0.387            |
| 7 years                | n=21             | n=4                |                  |
| AVA (cm <sup>2</sup> ) | 1.9 (1.0;2.5)    | 2.4 (1.7;*)        | 0.456            |
| vmax (m/s)             | 2.2 (1.8;2.4)    | 2.3 (2.0;2.7)      | 0.442            |
| pmax (mmHg)            | 15.0 (8.0;22.0)  | 17.8 (12.1;22.3)   | 0.538            |
| pmean (mmHg)           | 8.5 (5.0;14.5)   | 9.0 (5.5;11.0)     | 0.871            |
| EF (%)                 | 54 (44;64)       | 58 (48;69)         | 0.452            |

|                        |                 |                  |       |
|------------------------|-----------------|------------------|-------|
| AR $\geq$ 2 - no. (%)  | 2 (9.5%)        | 1 (25%)          | 0.408 |
| $\geq$ 7 years         | n=28            | n=4              |       |
| AVA (cm <sup>2</sup> ) | 2.0 (1.3;2.6)   | 2.4 (1.7;*)      | 0.704 |
| vmax (m/s)             | 2.1 (1.4;2.4)   | 2.3 (2.0;2.7)    | 0.237 |
| pmax (mmHg)            | 13.0 (8.0;20.0) | 17.8 (12.1;22.3) | 0.237 |
| pmean (mmHg)           | 7.8 (4.4;10.5)  | 9.0 (5.5;11.0)   | 0.728 |
| EF (%)                 | 55 (45;64)      | 58 (48;69)       | 0.527 |
| AR $\geq$ 2 - no. (%)  | 2 (7.1%)        | 1 (25%)          | 0.267 |

AVA – Aortic Valve Area, vmax – maximum velocity, pmax – maximum pressure gradient, pmean – mean pressure gradient, EF – Ejection Fraction, AR – Aortic regurgitation, MR – Mitral Regurgitation

Supplemental Table S8 - Echocardiographic data (Postdilatation vs. no Postdilatation)

|                        | No Postdilatation | Postdilatation   | p                |
|------------------------|-------------------|------------------|------------------|
| Discharge              | n=628             | n=85             |                  |
| AVA (cm <sup>2</sup> ) | 1.8 (1.6;2.2)     | 2.0 (1.7;2.3)    | 0.159            |
| vmax (m/s)             | 2.0 (1.7;2.3)     | 1.9 (1.7;2.3)    | 0.389            |
| pmax (mmHg)            | 16.0 (12.0;21.0)  | 15.0 (11.0;21.3) | 0.389            |
| pmean (mmHg)           | 9.0 (6.9;12.0)    | 8.0 (6.0;11.0)   | 0.357            |
| EF (%)                 | 60 (53;66)        | 59 (46;65)       | <b>0.030</b>     |
| AR ≥ 2 - no. (%)       | 45 (7.1%)         | 16 (18.8%)       | <b>&lt;0.001</b> |
| 1 year                 | n=357             | n=45             |                  |
| AVA (cm <sup>2</sup> ) | 1.8 (1.6;2.1)     | 1.9 (1.6;2.2)    | 0.342            |
| vmax (m/s)             | 1.9 (1.6;2.2)     | 1.9 (1.5;2.2)    | 0.660            |
| pmax (mmHg)            | 15.0 (11.0;21.0)  | 14.0 (9.5;18.0)  | 0.175            |
| pmean (mmHg)           | 8.0 (6.0;11.0)    | 7.0 (5.0;9.0)    | 0.054            |
| EF (%)                 | 60 (54;65)        | 60 (50;66)       | 0.659            |
| AR ≥ 2 - no. (%)       | 19 (5.3%)         | 6 (13.3%)        | 0.030            |
| 3 years                | n=103             | n=21             |                  |
| AVA (cm <sup>2</sup> ) | 1.8 (1.5;2.1)     | 1.7 (1.4;2.7)    | 0.837            |
| vmax (m/s)             | 1.8 (1.6;2.3)     | 2.1 (1.8;2.3)    | 0.395            |
| pmax (mmHg)            | 14.0 (10.5;21.5)  | 17.0 (13.0;22.5) | 0.562            |
| pmean (mmHg)           | 8.0 (6.0;11.9)    | 9.5 (5.5;12.0)   | 0.861            |
| EF (%)                 | 60 (50;65)        | 55 (47;61)       | 0.058            |
| AR ≥ 2 - no. (%)       | 5 (4.9%)          | 2 (9.5%)         | 0.378            |
| 5 years                | n=72              | n=14             |                  |
| AVA (cm <sup>2</sup> ) | 1.6 (1.4;2.0)     | 1.8 (1.6;1.9)    | 0.511            |
| vmax (m/s)             | 1.9 (1.4;2.2)     | 1.9 (1.3;2.2)    | 0.858            |
| pmax (mmHg)            | 15.0 (9.0;19.0)   | 17.8 (9.1;23.3)  | 0.442            |
| pmean (mmHg)           | 8.0 (5.0;11.0)    | 9.0 (4.0;12.3)   | 0.697            |
| EF (%)                 | 58 (50;62)        | 55 (49;60)       | 0.412            |
| AR ≥ 2 - no. (%)       | 2 (2.8 %)         | 2 (14.3%)        | 0.061            |
| 7 years                | n=25              | n=0              |                  |
| AVA (cm <sup>2</sup> ) | 2.0 (1.0;2.5)     | n.a.             | n.a.             |
| vmax (m/s)             | 2.2 (1.9;2.5)     | n.a.             | n.a.             |
| pmax (mmHg)            | 15.3 (8.3;22.0)   | n.a.             | n.a.             |
| pmean (mmHg)           | 8.5 (5.3;12.0)    | n.a.             | n.a.             |

|                        |                 |      |      |
|------------------------|-----------------|------|------|
| EF (%)                 | 55 (46;64)      | n.a. | n.a. |
| AR $\geq$ 2 - no. (%)  | 3 (9.7%)        | n.a. | n.a. |
| $\geq$ 7 years         | n=32            | n=0  |      |
| AVA (cm <sup>2</sup> ) | 2.1 (1.5;2.6)   | n.a. | n.a. |
| vmax (m/s)             | 2.2 (1.6;2.4)   | n.a. | n.a. |
| pmax (mmHg)            | 14.0 (8.0;20.0) | n.a. | n.a. |
| pmean (mmHg)           | 7.5 (5.0;11.0)  | n.a. | n.a. |
| EF (%)                 | 55 (45;64)      | n.a. | n.a. |
| AR $\geq$ 2 - no. (%)  | 3 (9.4%)        | n.a. | n.a. |

AVA – Aortic Valve Area, vmax – maximum velocity, pmax – maximum pressure gradient, pmean – mean pressure gradient, EF – Ejection Fraction, AR – Aortic regurgitation, MR – Mitral Regurgitation

Supplemental Table S9 – Number of patients with structural valve deterioration (SVD) in subgroups

|                                                      | Moderate SVD<br>n=20 | Severe SVD<br>n=6 | P     |
|------------------------------------------------------|----------------------|-------------------|-------|
| Postdilatation – n (% of all patients with PD)       | 3 (3.1%)             | 1 (1.0%)          | 0.751 |
| No postdilatation – n (% of all patients without PD) | 17 (2.4%)            | 5 (0.7%)          |       |
| SE valves - n (% of all patients with SE valves)     | 13 (2.1%)            | 4 (0.6%)          | 0.130 |
| BE valves - n (% of all patients with BE valves)     | 7 (4.1%)             | 2 (1.2%)          |       |

SE valves – Self-Expandable valves, BE valves – Balloon-Expandable valves

Supplemental Figure S1 - Survival of subgroups adjusted for differences in baseline and procedural characteristics using Cox regression analysis

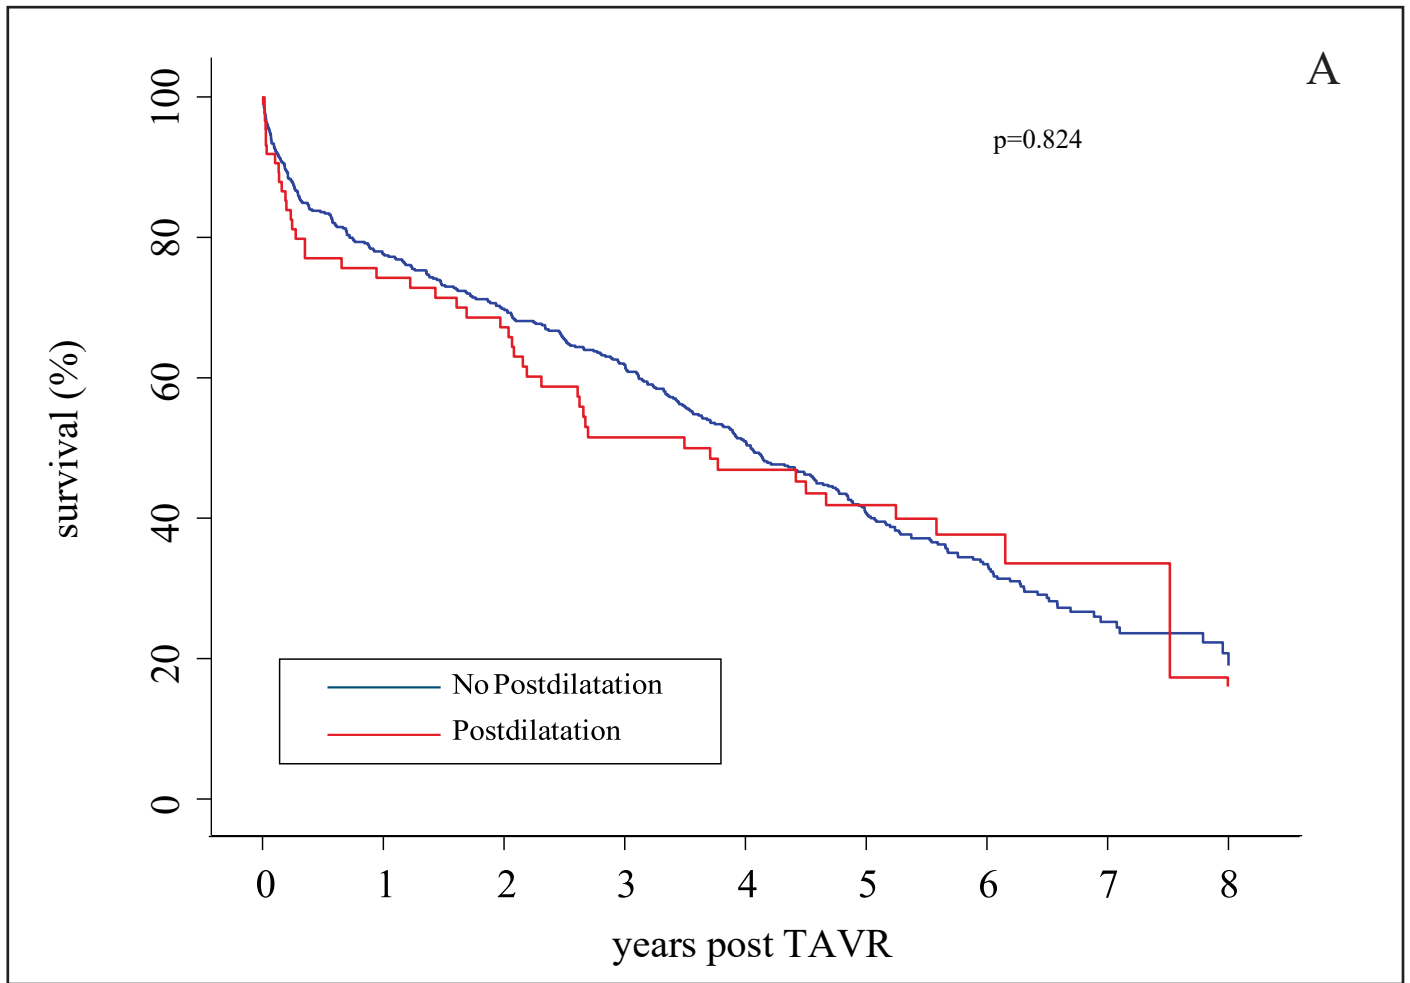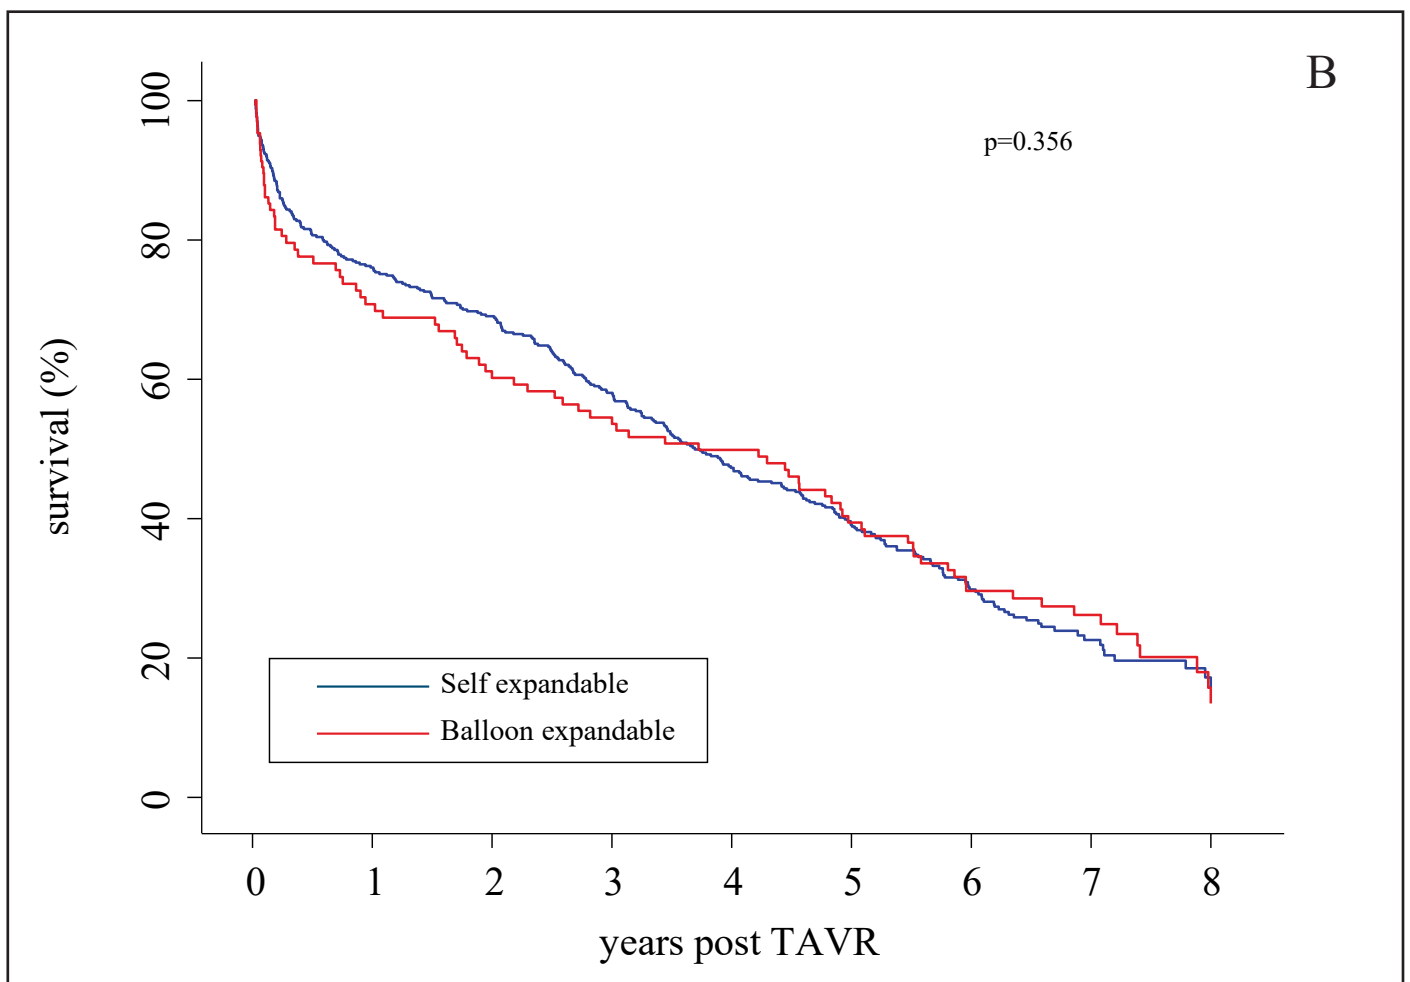

Supplementary Figure S2 - Kaplan-Meier survival estimates for AR  $\geq 2$  and AR  $< 2$  groups

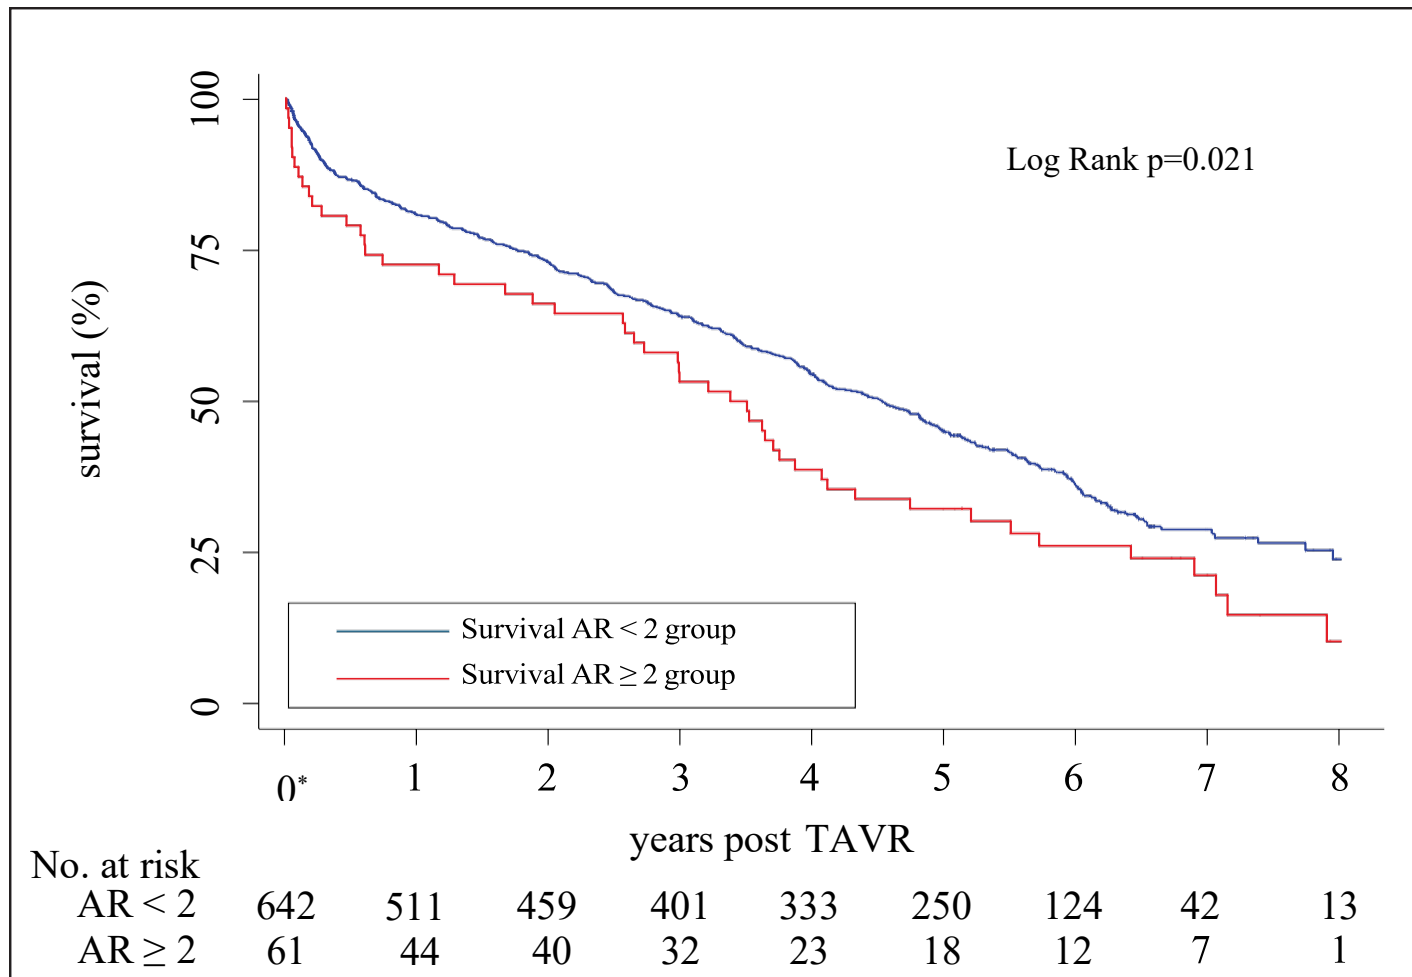

\* Echocardiographic data for AR after TAVR and before discharge was available for 703 patients.



Supplemental Figure S3

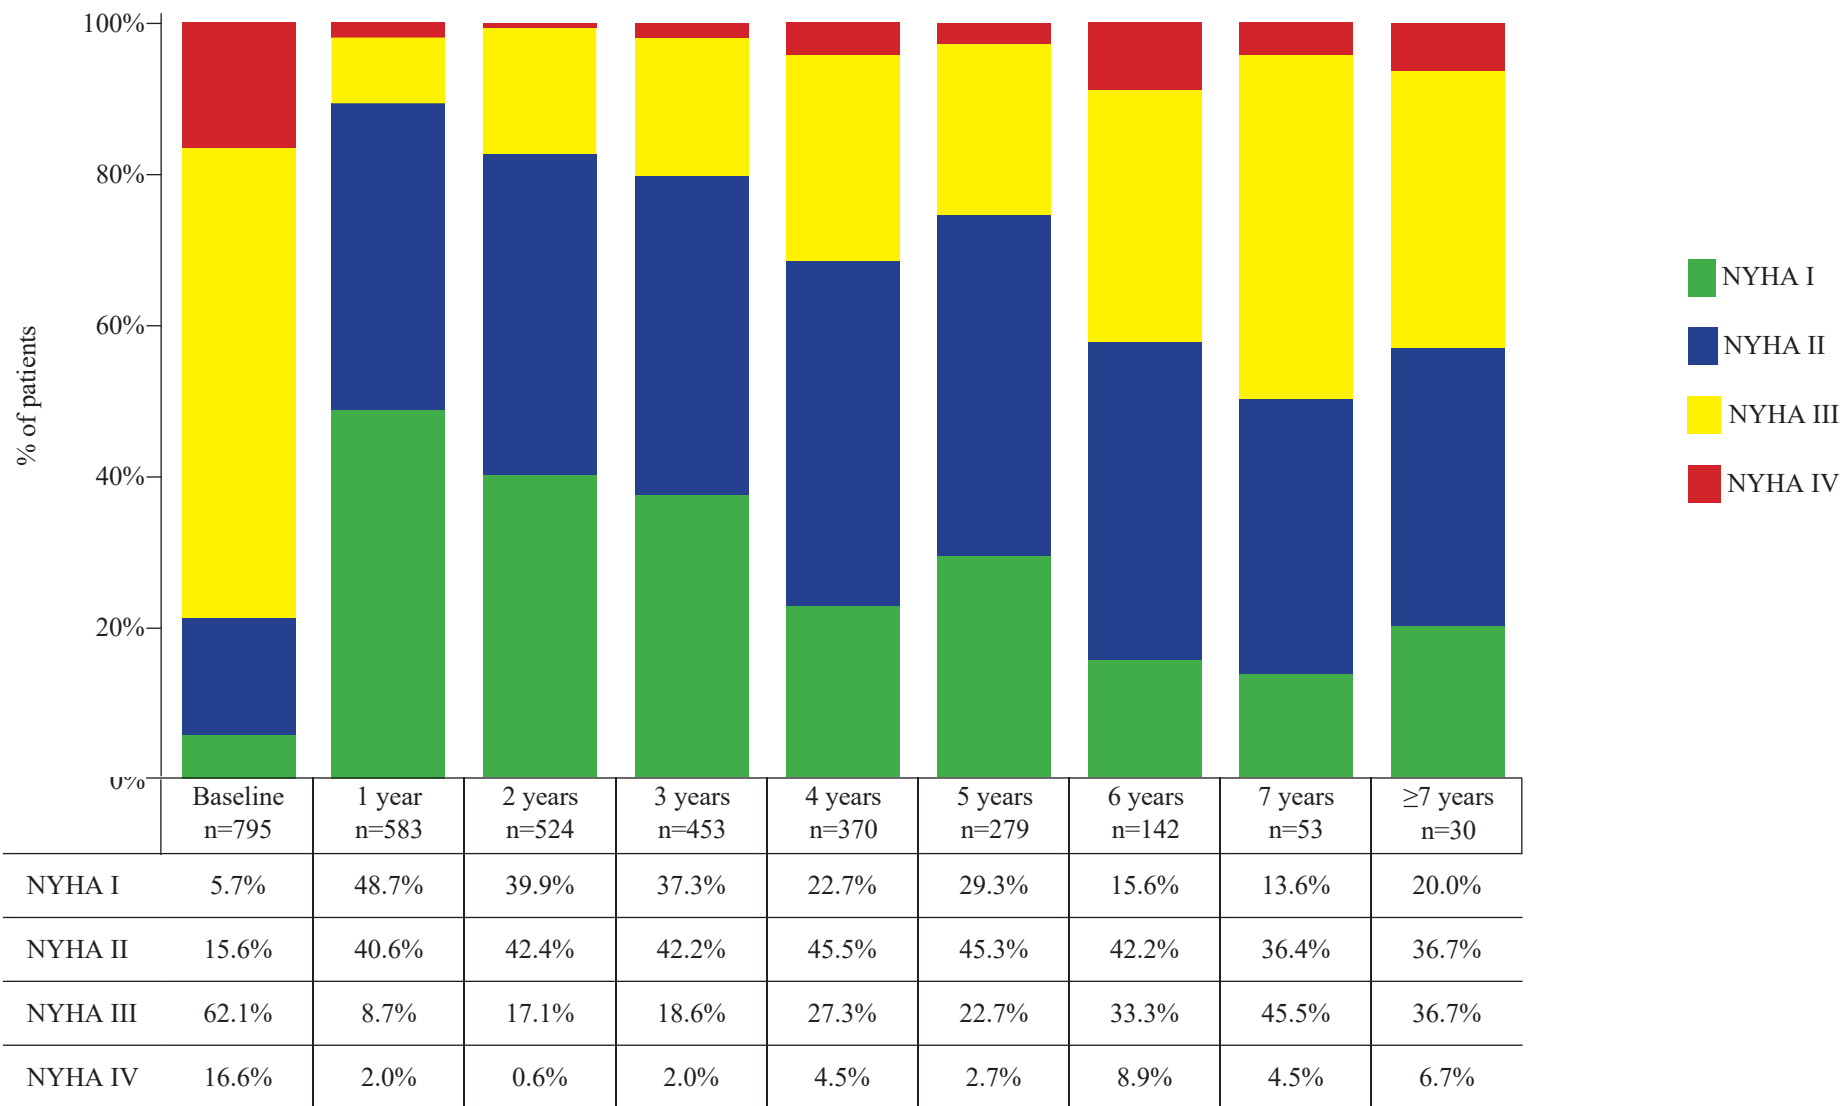

NYHA = New York Heart Association class;
